# Supplementary figures and images for: Ligand-mediated interaction in a dispersion of lead-halide perovskite nanocubes: implications on directed structures in equilibrium
Source: Royal Society of Chemistry journal article supplement (doi:10.1039/d4cp04012k), 2025-01-01

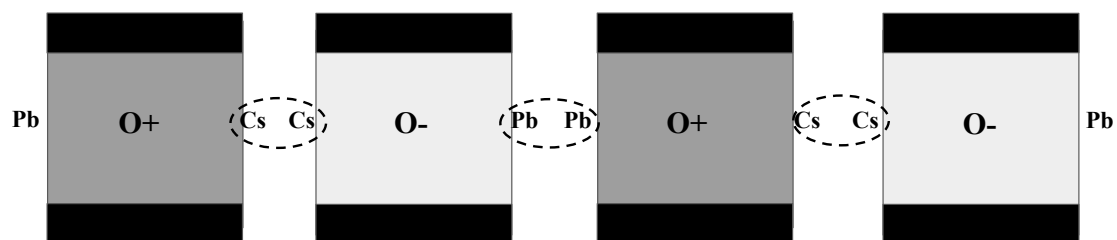

Figure S1: Ground state of the 1D arrangement

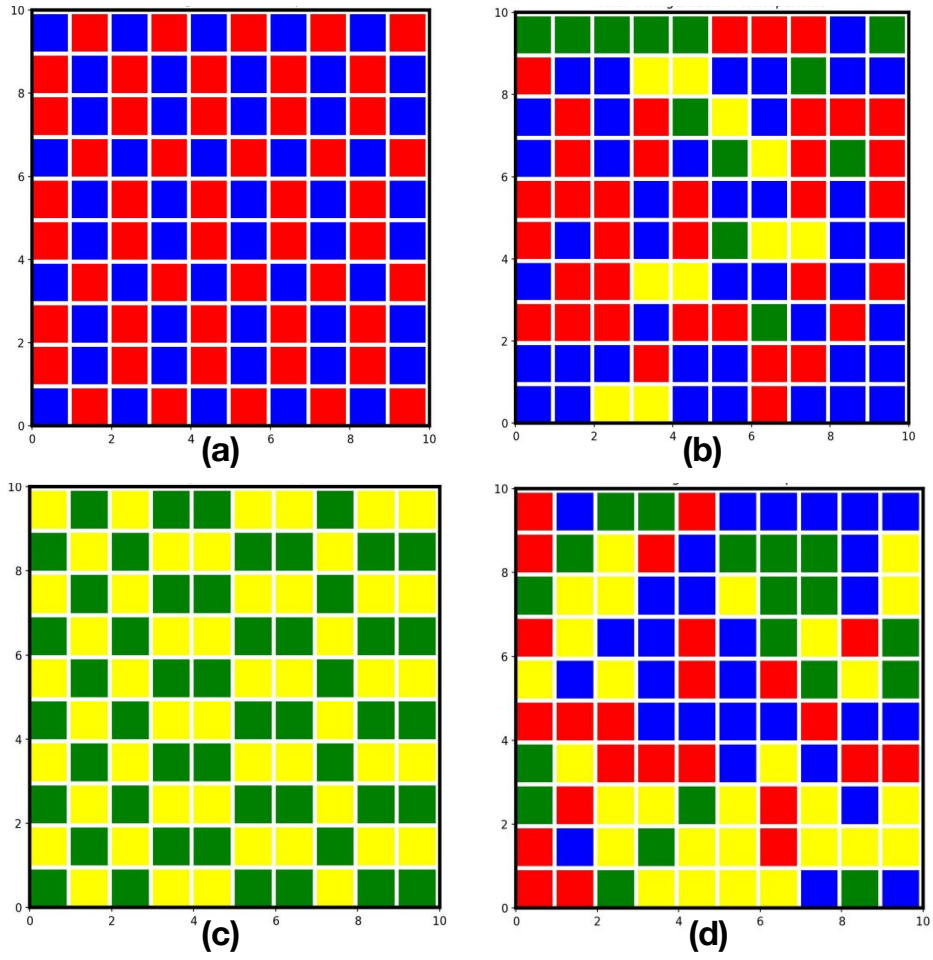

Figure S2: Snapshot of 2D  $N \times N$  arrangement for  $N=10$

Supplement: d4cp04012k1.pdf [file d4cp04012k1.pdf]
